# Supplementary material
Source: PubMed Central journal article supplement (PMC4243998)
Supplement: pro0023-1275-sd1.pdf [file pro0023-1275-sd1.pdf]

## Supplementary Material for

### **A maximum entropy approach to the study of residue-specific backbone angle distributions in $\alpha$ -synuclein, an intrinsically disordered protein**

Alexey B. Mantsyzov<sup>1</sup>, Alexander S. Maltsev<sup>1</sup>, Jinfu Ying<sup>1</sup>, Yang Shen<sup>1</sup>, Gerhard Hummer<sup>1,2</sup> and Ad Bax<sup>1</sup>

<sup>1</sup> Laboratory of Chemical Physics, National Institute of Diabetes and Digestive and Kidney Diseases, National Institutes of Health, Bethesda, MD 20892, USA

<sup>2</sup> Max Planck Institute of Biophysics, Max-von-Laue-Straße 3, D-60438 Frankfurt am Main, Germany

### Cross validation of $\phi/\psi$ distributions

Cross validation of the residue-specific  $\phi/\psi$  distributions is difficult due to the relatively modest departures from the statistical coil library obtained for aS. As a result, predicted deviations from random coil values are relatively small, and the difficulty is compounded by the substantial uncertainty in the relation between the predicted parameter and the structural variables  $\phi$  and  $\psi$ . The most unambiguous parameter in this respect is the  ${}^3J_{\text{HNH}\alpha}$  coupling, which has been shown to fit a Karplus equation of an RDC-refined structure to better than 0.4 Hz rmsd. However, omitting the  ${}^3J_{\text{HNH}\alpha}$  couplings from the input parameters when optimizing eq 2, main text, removes one of the most important parameters from the input restraints. Cross validation that removes  ${}^3J_{\text{HNH}\alpha}$  couplings from the input parameters therefore underestimates the true accuracy of the predictions. Bearing this in mind, with an rmsd between observed and calculated values of 0.38 Hz, results shown in Figure S5 indicate a good correlation between experimental and predicted values. In part, however, this correlation is biased by the different  $\phi/\psi$  distributions present in the statistical coil library for different residue types, resulting in smaller  ${}^3J_{\text{HNH}\alpha}$  values for e.g. Ala compared to the  $\beta$ -branched residues.<sup>1</sup> However, even when restricting the analysis to residues of a given type, where this consideration does not play a role, the correlation remains good, ranging from a Pearson's correlation coefficient,  $R_p = 0.53$  for Ala residues (N=9; rmsd = 0.32 Hz) to  $R_p = 0.98$  for Thr (N=7; rmsd = 0.21 Hz).

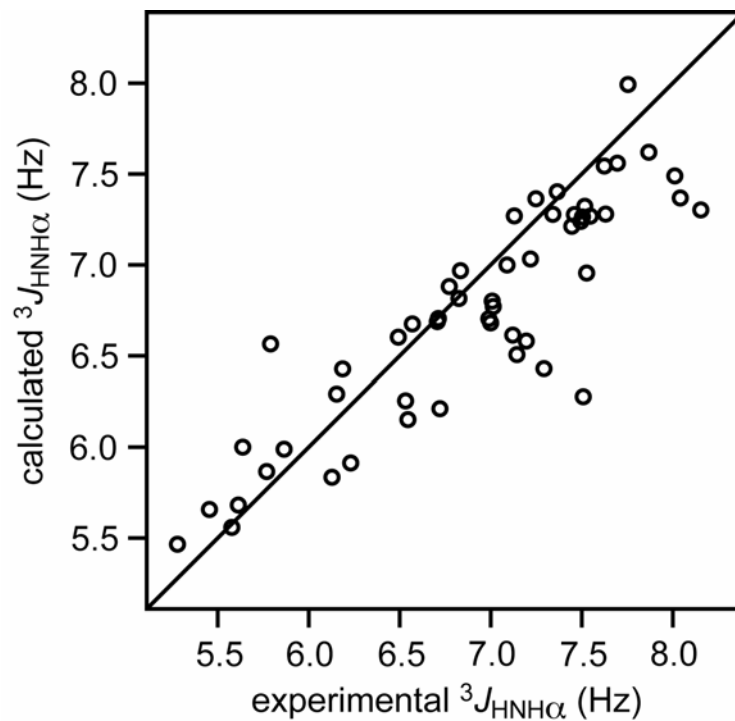

**Supplementary Figure S1.** Cross validation results for the  ${}^3J_{\text{HNH}\alpha}$  values, obtained when deriving  $\phi/\psi$  distributions in the same manner as described in the text, but omitting  ${}^3J_{\text{HNH}\alpha}$  from the input restraints. Calculated  ${}^3J_{\text{HNH}\alpha}$  values correspond to the weighted average of the conformers derived using the 9 remaining input parameters, and a  $\theta$  value of 0.8. The Pearson's correlation coefficient equals 0.88, and the rmsd between observed and predicted  ${}^3J_{\text{HNH}\alpha}$  values is 0.38 Hz.

**Supplementary Figure S2.** Distribution fits of the backbone angles to 10 independent experimental parameters for all non-Gly/Pro residues with complete sets of 10 NMR parameters. The value of  $\theta$  which shows a modest increase (the larger of 0.25 or 25% of the  $\chi^2$  value obtained for  $\theta=0.4$ ) is selected to define the ensemble that best describes the experimental data. The following  $\theta$  were selected: V3, 0.8; M5, 0.4; L8, 0.4; V15, 0.8; V16, 0.8; A17, 0.8; A19, 0.8; E20, 0.8; K21, 0.8; T22, 1.6; V26, 0.8; A27, 0.8; K32, 0.8; T33, 1.6; V37, 0.8; V40, 0.8; S42, 1.6; K43, 0.4; A53, 0.8; A56, 0.8; E57, 1.6; K58, 0.8; T64, 0.4; N65, 0.4; V66, 0.4; V70, 1.6; V71, 0.8; T72, 0.8; T75, 0.8; A76, 0.4; V77, 0.8; K80, 1.6; T81, 0.8; E83, 1.6; A85, 0.8; S87, 0.8; I88, 0.8; A91, 0.8; T92, 0.4; V95, 1.6; D98, 0.4; K102, 0.8; N103, 0.4; I112, 0.4; D121, 0.4; N122, 0.4; E123, 0.8; A124, 0.8; Y125, 0.8; Y133, 0.8; Q134, 0.8; E139, 0.8.

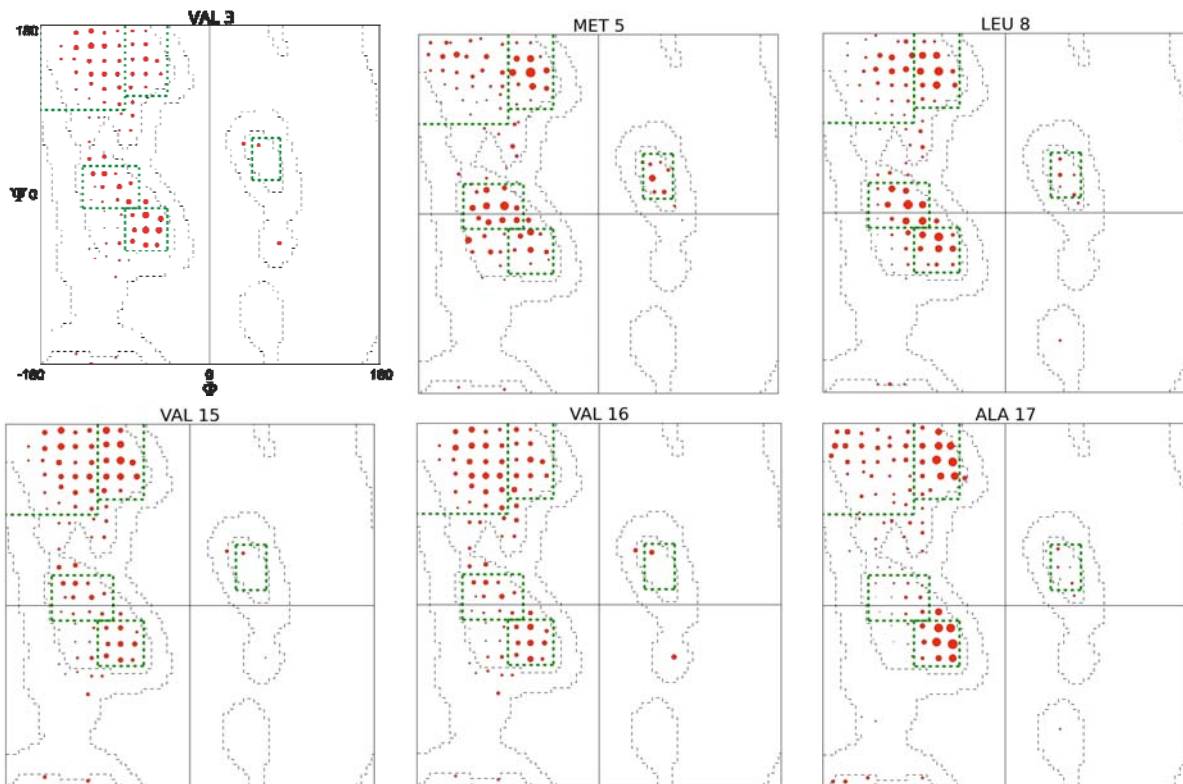

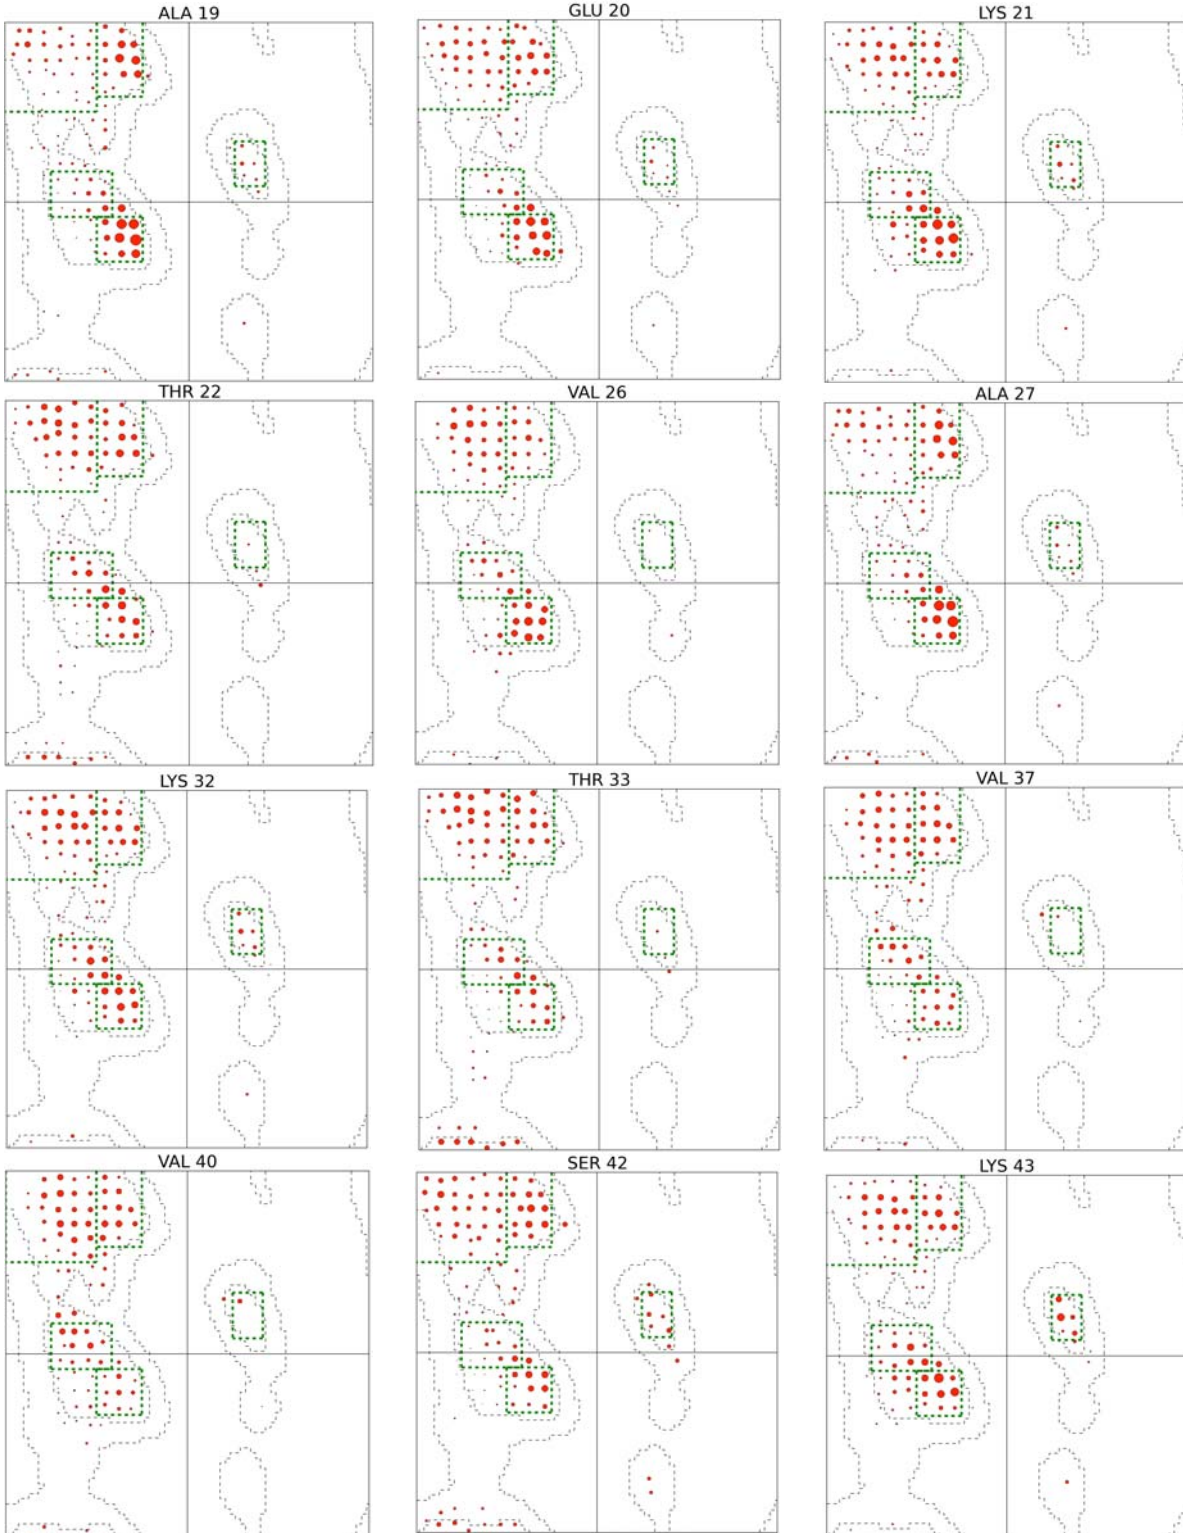

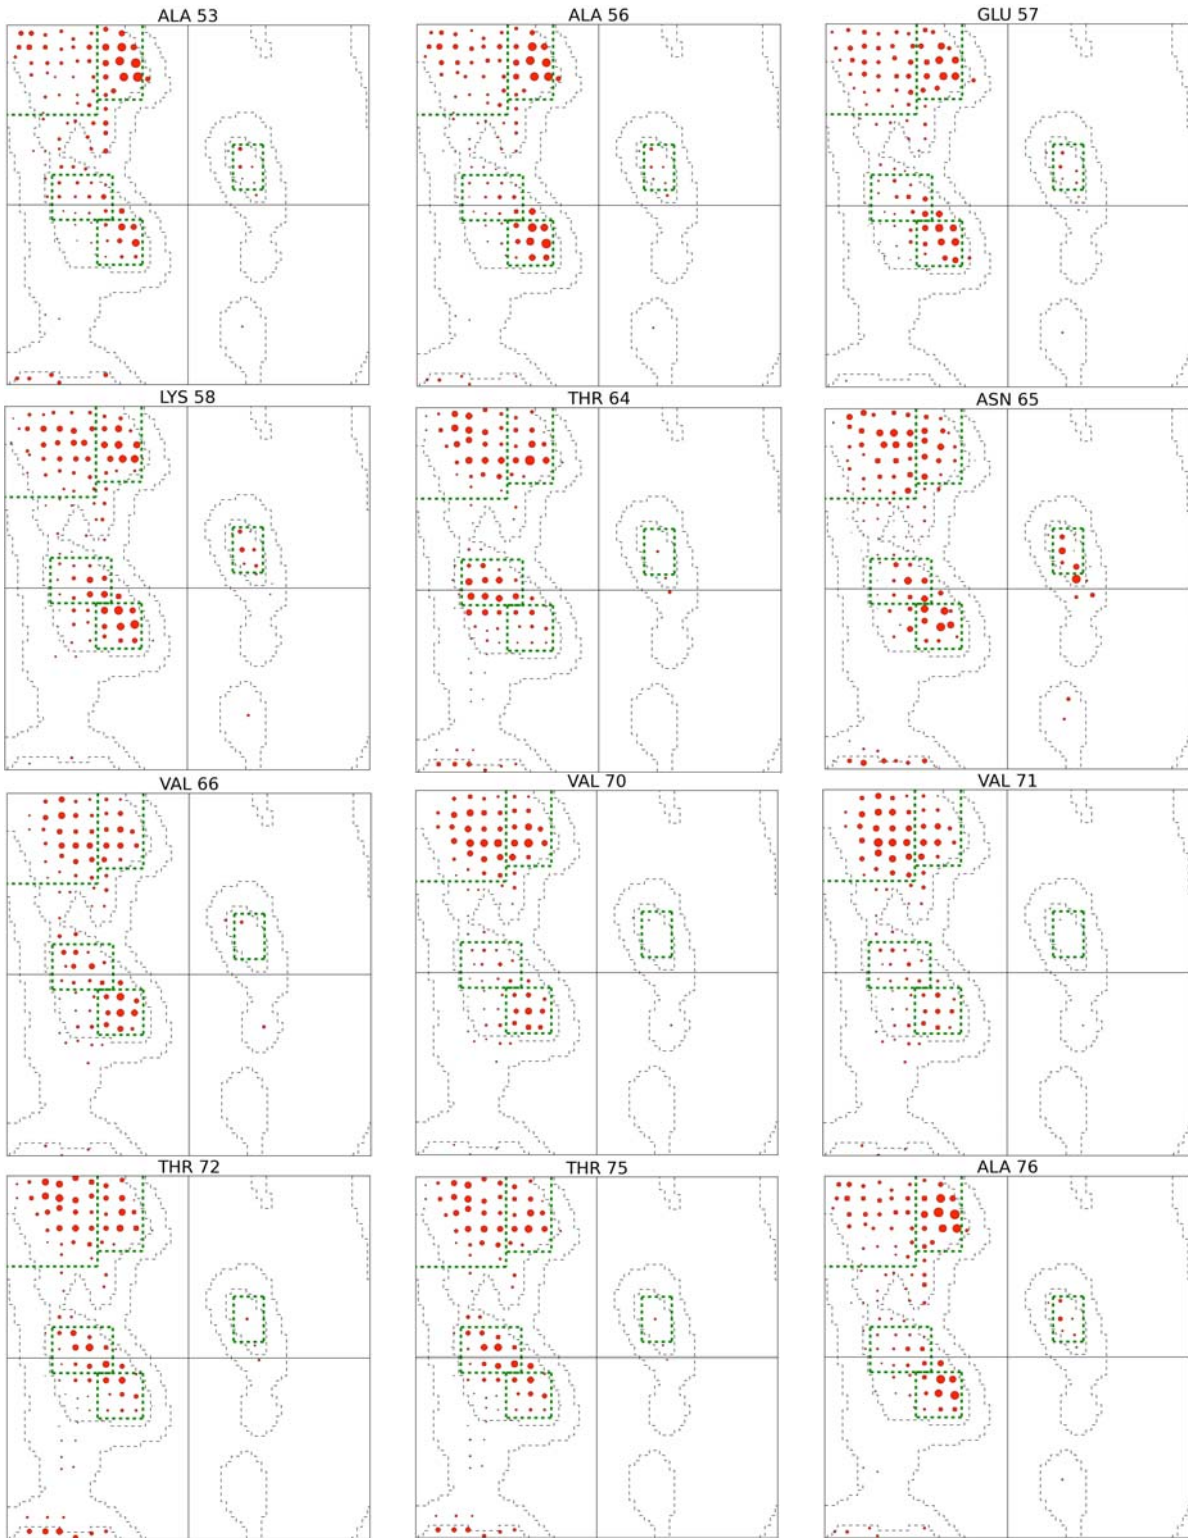



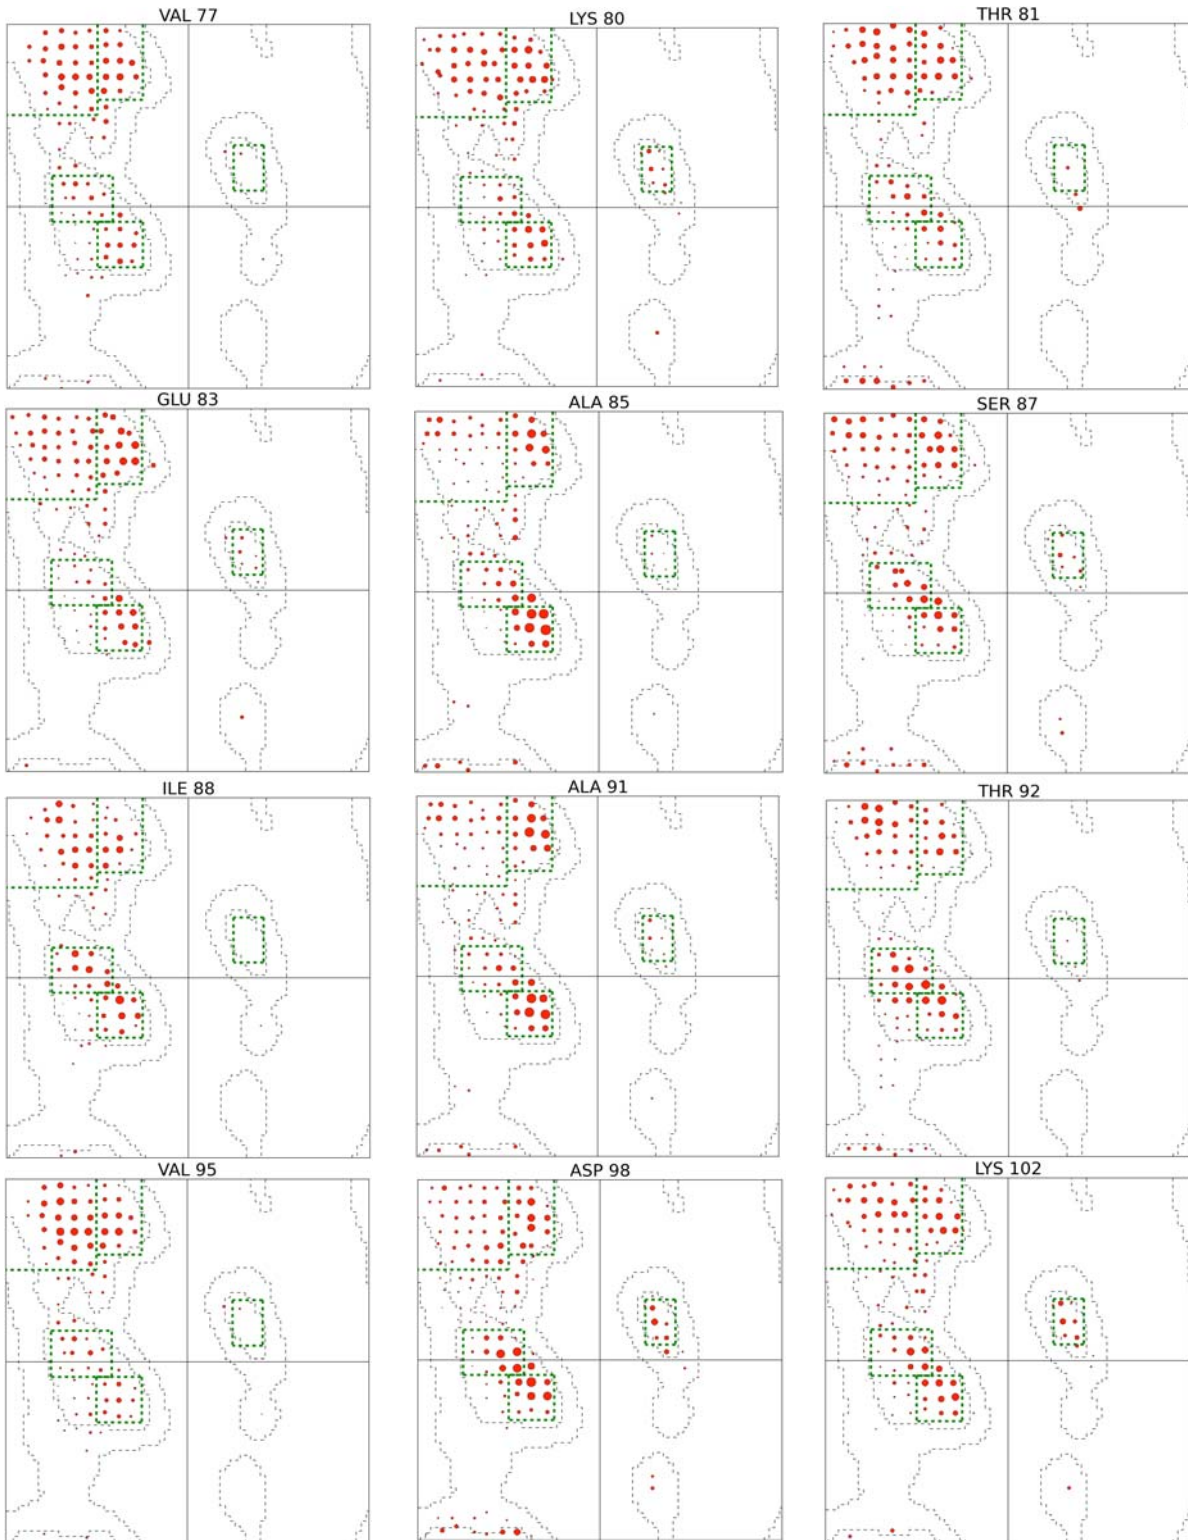

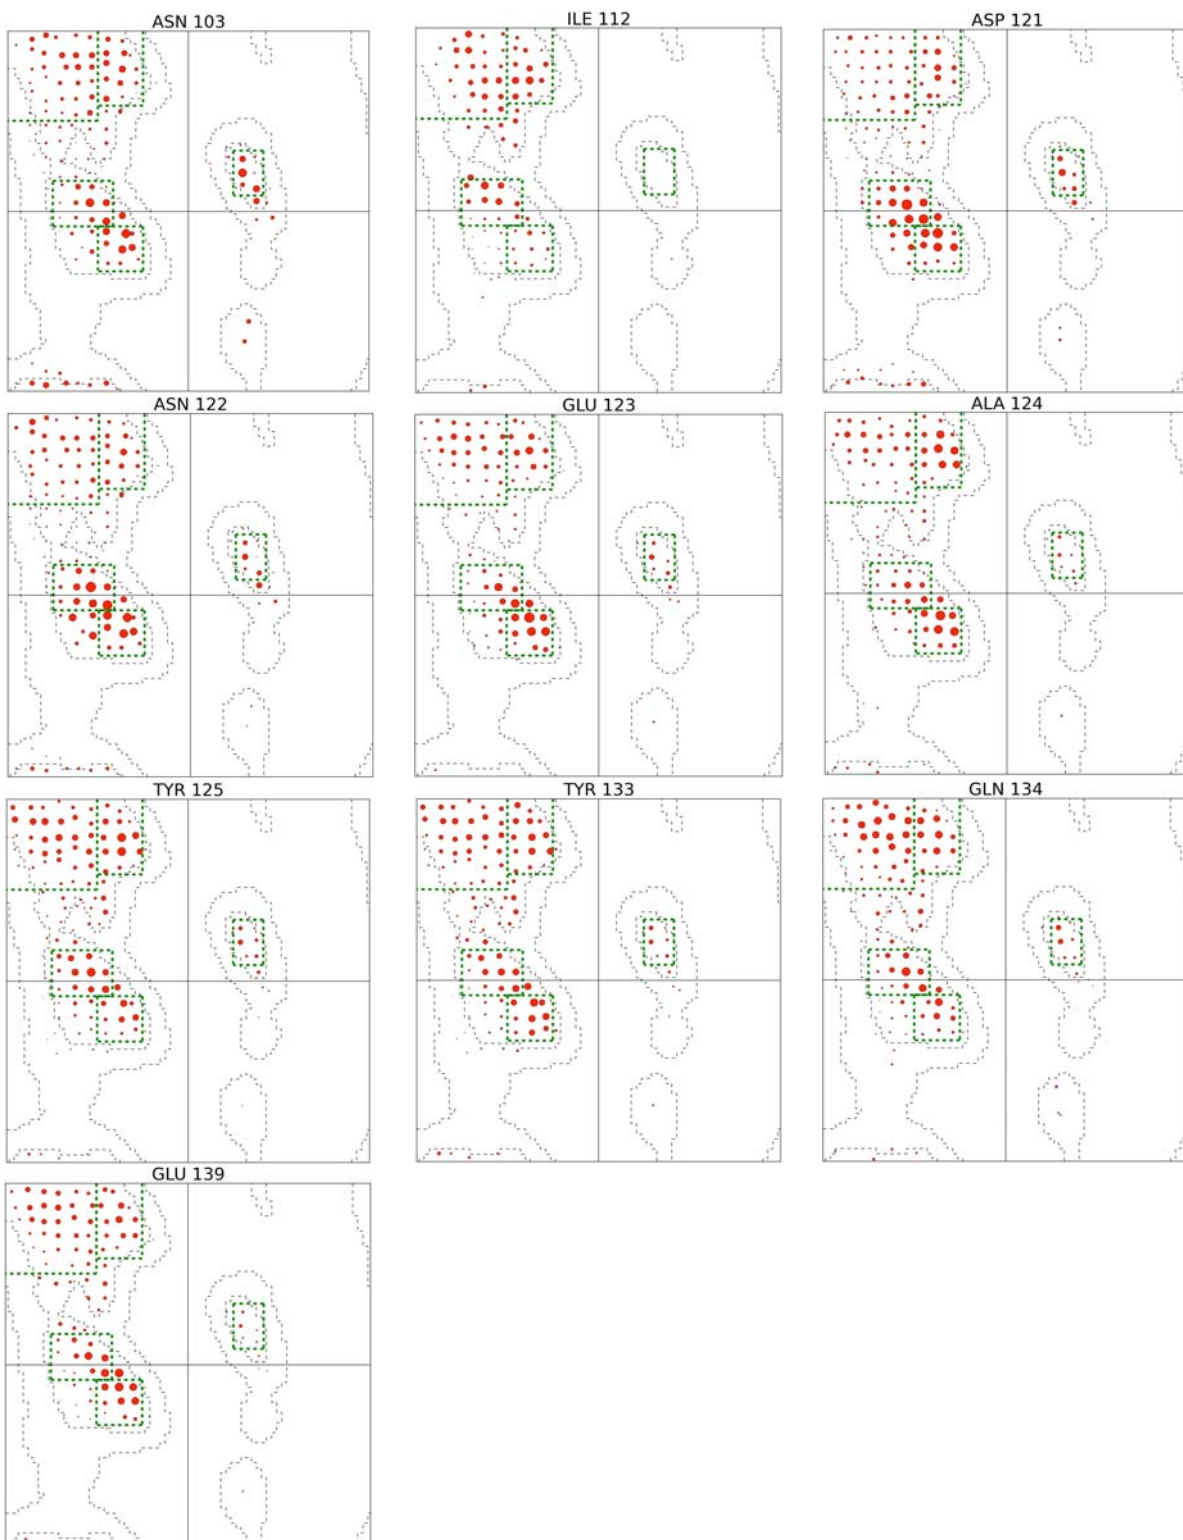

**End of Supplementary Figure S2.**



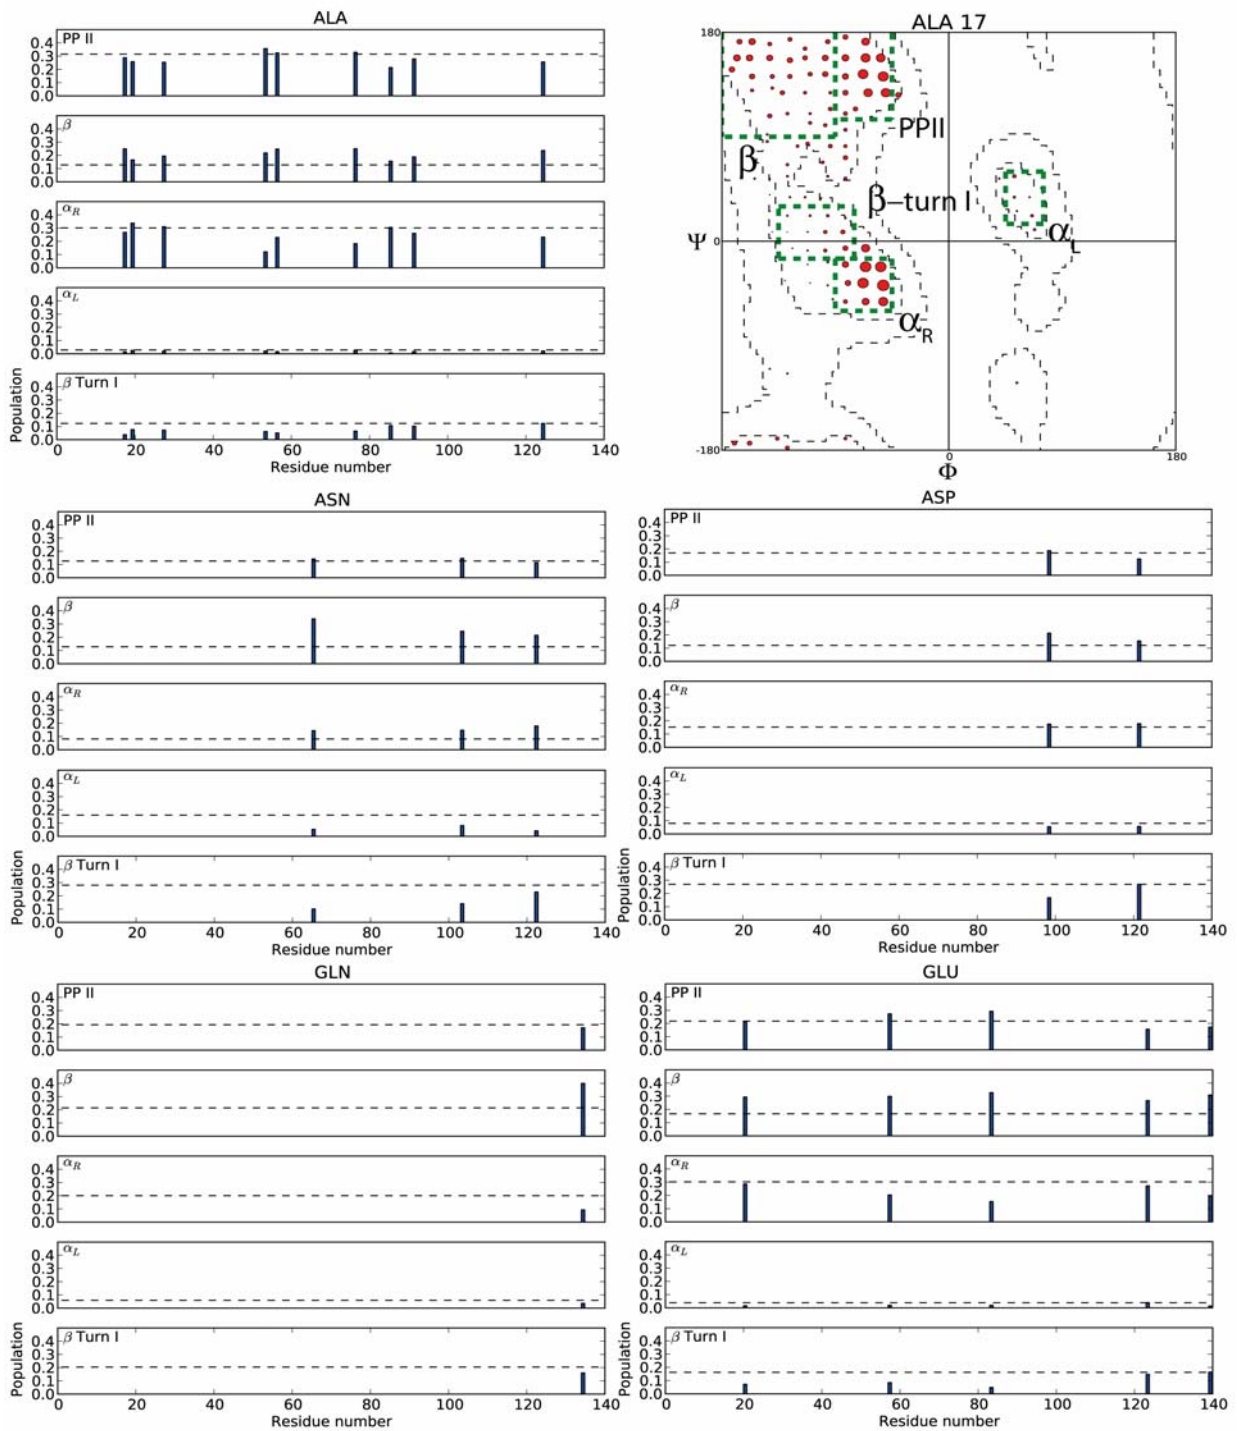

**Supplementary Figure S3.** Populations of the five main regions in the Ramachandran map for all non-Pro/Gly residues in aS for which a full set of 10 parameters was available. Regions are marked in the top right panel for A17. The dashed line for each residue type corresponds to the population of the region in the coil database.

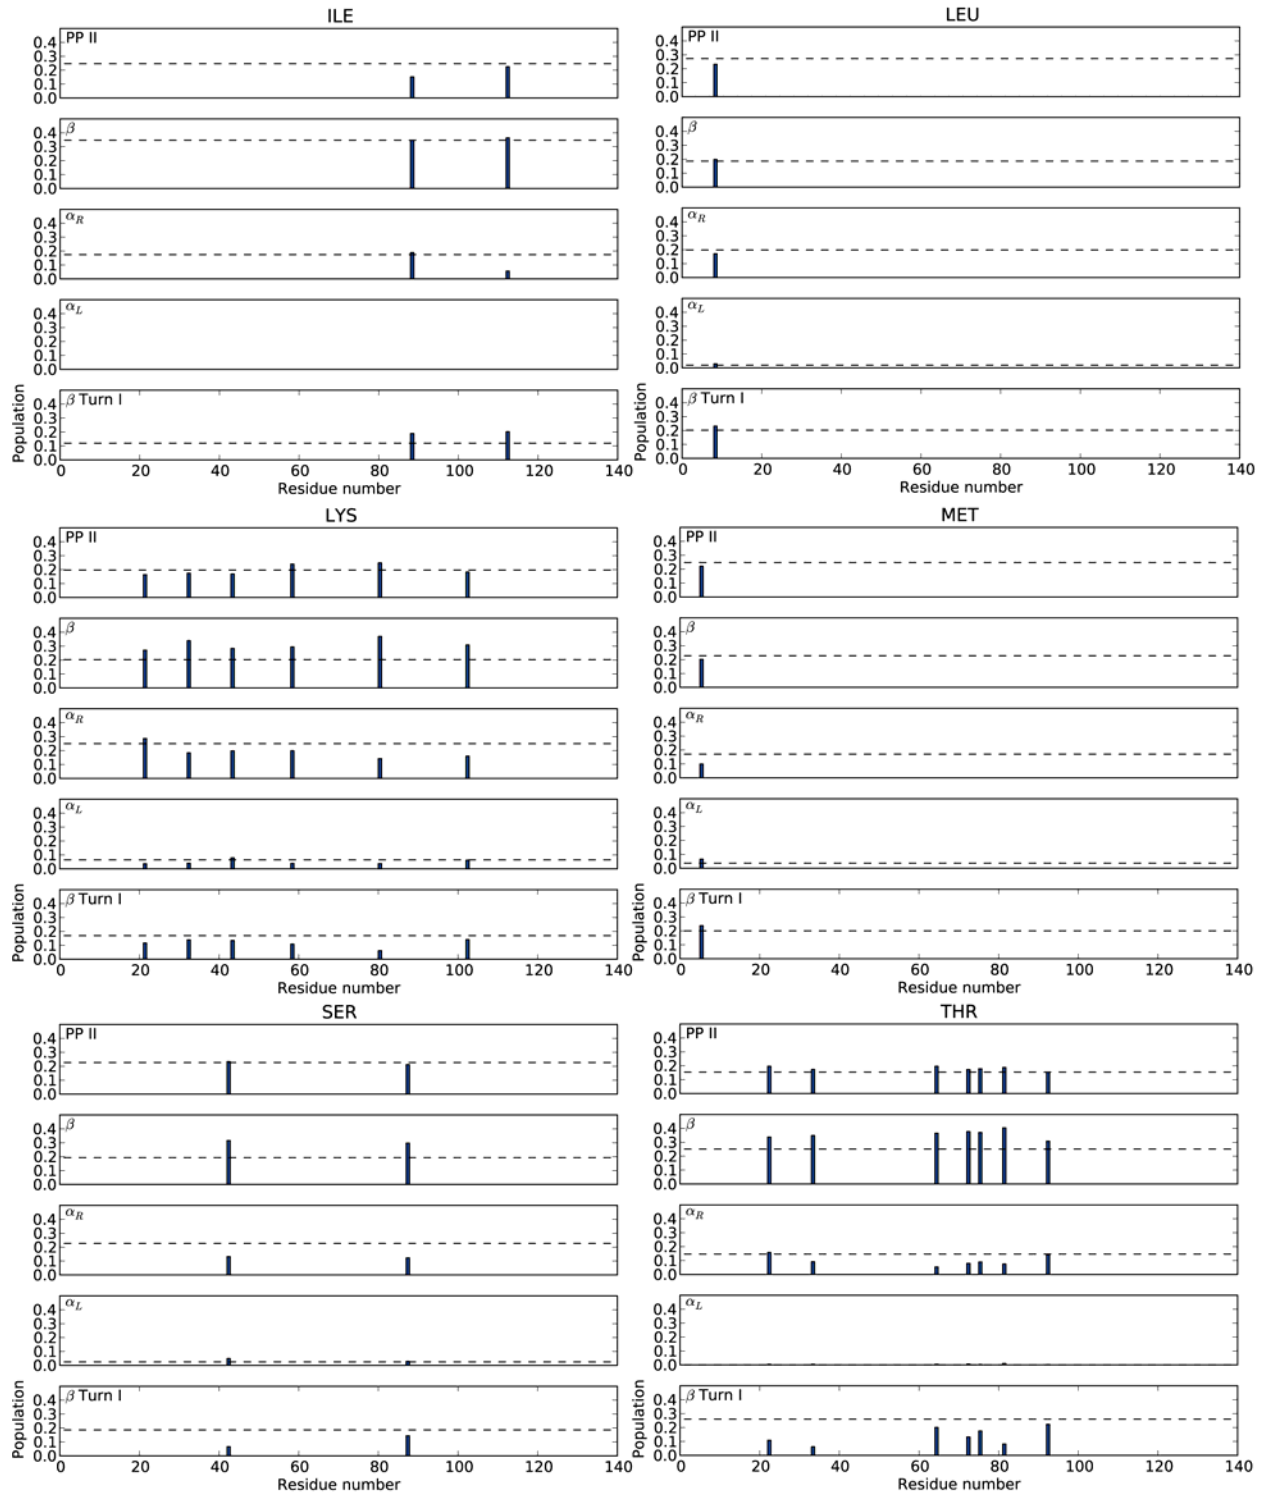

Supplementary Figure S3, continued

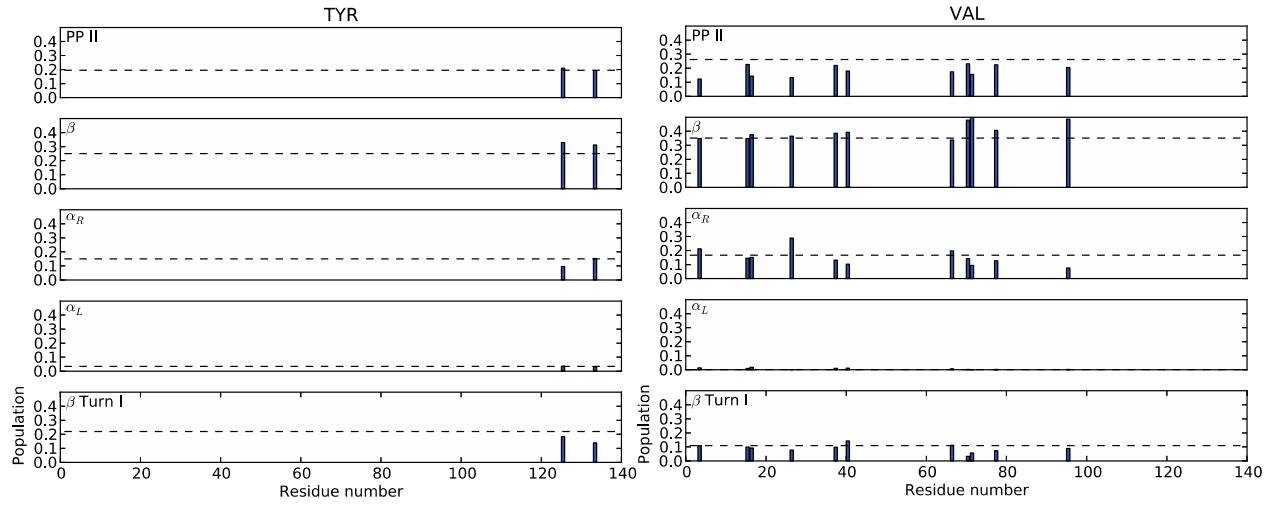

Supplementary Figure S3, continued

**Supplementary Table S1.**  $J$  couplings and  $^1\text{H}$ - $^1\text{H}$  cross relaxation rates measured in  $^1\text{H}/^{15}\text{N}$ -aS (for  $^1\text{H}$ - $^1\text{H}$  cross relaxation rates and  $^3J_{\text{HNH}\alpha}$ ), in  $^1\text{H}/^{15}\text{N}/^{13}\text{C}$ -aS (for  $^1J_{\text{H}\alpha\text{C}\alpha}$ ), and in  $^2\text{H}/^{15}\text{N}/^{13}\text{C}$ -aS (for  $^1J_{\text{NC}\alpha}$ ;  $^2J_{\text{NC}\alpha}$ ), at 15 °C, pH 6. Experimental uncertainties for  $^1J_{\text{H}\alpha\text{C}\alpha}$ ,  $^2J_{\text{NC}\alpha}$  and  $^3J_{\text{NC}\alpha}$  are 0.1 Hz, and 0.03 Hz for  $^3J_{\text{HNH}\alpha}$ . Uncertainties in the  $^1\text{H}$ - $^1\text{H}$  cross relaxation rates are  $< \sim 10\%$ .

|     | $^1J_{\text{H}\alpha\text{C}\alpha}$<br>[Hz] | $^1J_{\text{NC}\alpha}$<br>[Hz] | $^2J_{\text{C}\alpha\text{I}\text{N}\text{i}+1}$<br>[Hz] | $^3J_{\text{HNH}\alpha}$<br>[Hz] | $R_{\text{cross}}$ [1/s]                    |                                                 |                                                   |
|-----|----------------------------------------------|---------------------------------|----------------------------------------------------------|----------------------------------|---------------------------------------------|-------------------------------------------------|---------------------------------------------------|
|     |                                              |                                 |                                                          |                                  | $\text{H}_i^{\text{N}}-\text{H}_i^{\alpha}$ | $\text{H}_i^{\alpha}-\text{H}_{i+1}^{\text{N}}$ | $\text{H}_i^{\text{N}}-\text{H}_{i+1}^{\text{N}}$ |
| D2  | 143.5                                        |                                 | 8.54                                                     |                                  |                                             | 0.412                                           |                                                   |
| V3  | 142.0                                        | 10.48                           | 7.26                                                     | 7.25                             | 0.114                                       | 0.414                                           | 0.098                                             |
| F4  | 144.0                                        | 10.73                           | 7.70                                                     | 7.13                             | 0.136                                       | 0.456                                           | 0.108                                             |
| M5  | 142.1                                        | 10.63                           | 7.95                                                     | 7.13                             | 0.198                                       | 0.473                                           | 0.297                                             |
| K6  |                                              | 10.65                           | 8.06                                                     | 6.11                             | 0.178                                       |                                                 | 0.080                                             |
| G7  |                                              | 11.65                           | 8.17                                                     |                                  |                                             |                                                 |                                                   |
| L8  | 142.2                                        | 10.84                           | 7.79                                                     | 7.01                             | 0.167                                       | 0.504                                           | 0.135                                             |
| S9  | 143.2                                        | 11.52                           | 7.69                                                     | 6.53                             | 0.195                                       |                                                 | 0.047                                             |
| K10 | 142.2                                        | 10.71                           | 7.62                                                     |                                  |                                             | 0.485                                           | 0.071                                             |
| A11 | 144.2                                        | 11.04                           | 8.35                                                     | 5.30                             | 0.167                                       |                                                 | 0.070                                             |
| K12 |                                              | 10.68                           | 7.81                                                     | 6.64                             |                                             |                                                 | 0.105                                             |
| E13 | 143.1                                        |                                 | 8.34                                                     | 6.18                             |                                             | 0.701                                           | 0.070                                             |
| G14 |                                              | 11.63                           | 8.32                                                     |                                  |                                             |                                                 |                                                   |
| V15 | 142.3                                        | 10.85                           | 8.33                                                     | 7.37                             | 0.171                                       | 0.765                                           | 0.123                                             |
| V16 | 142.0                                        | 10.10                           | 7.72                                                     | 7.63                             | 0.213                                       | 0.750                                           | 0.122                                             |
| A17 | 144.2                                        | 10.80                           | 8.31                                                     | 5.45                             | 0.193                                       | 0.643                                           | 0.084                                             |
| A18 | 144.1                                        | 10.74                           | 7.95                                                     | 5.22                             | 0.174                                       | 0.522                                           |                                                   |
| A19 | 144.7                                        | 10.74                           | 7.86                                                     | 5.28                             | 0.206                                       | 0.559                                           | 0.120                                             |
| E20 | 143.8                                        | 10.69                           | 7.90                                                     | 6.13                             | 0.209                                       | 0.734                                           | 0.111                                             |
| K21 | 143.2                                        | 10.40                           | 7.77                                                     | 6.53                             | 0.227                                       | 0.624                                           | 0.156                                             |
| T22 | 142.0                                        | 11.51                           | 7.54                                                     | 6.99                             | 0.250                                       | 0.890                                           | 0.108                                             |
| K23 |                                              | 10.65                           |                                                          | 6.65                             | 0.195                                       |                                                 | 0.072                                             |
| Q24 | 141.9                                        |                                 | 8.35                                                     | 6.69                             |                                             |                                                 | 0.075                                             |
| G25 |                                              | 11.75                           | 8.39                                                     |                                  |                                             |                                                 |                                                   |
| V26 | 141.8                                        | 10.77                           | 7.40                                                     | 7.12                             | 0.183                                       | 0.554                                           | 0.128                                             |
| A27 | 144.6                                        | 10.71                           | 8.03                                                     | 5.58                             | 0.190                                       | 0.512                                           | 0.110                                             |
| E28 | 143.6                                        | 10.60                           | 7.67                                                     | 6.08                             | 0.178                                       |                                                 | 0.088                                             |
| A29 | 143.8                                        | 10.62                           | 8.06                                                     |                                  |                                             |                                                 | 0.053                                             |
| A30 | 143.7                                        |                                 | 8.15                                                     |                                  |                                             | 0.473                                           | 0.134                                             |
| G31 |                                              | 11.65                           | 7.95                                                     |                                  |                                             |                                                 |                                                   |
| K32 | 142.5                                        | 10.91                           | 8.01                                                     | 7.01                             | 0.174                                       | 0.653                                           | 0.111                                             |
| T33 | 141.5                                        | 11.70                           | 7.72                                                     | 7.22                             | 0.188                                       | 0.583                                           | 0.061                                             |
| K34 | 142.4                                        |                                 | 7.73                                                     |                                  | 0.212                                       |                                                 |                                                   |
| E35 |                                              | 11.00                           | 8.21                                                     | 6.30                             |                                             |                                                 |                                                   |
| G36 |                                              | 11.66                           | 8.29                                                     |                                  |                                             |                                                 |                                                   |
| V37 | 141.6                                        | 10.87                           | 7.65                                                     | 7.50                             | 0.209                                       | 1.016                                           | 0.119                                             |

|     |       |       |      |      |       |       |       |
|-----|-------|-------|------|------|-------|-------|-------|
| L38 | 142.3 | 10.54 |      | 7.04 | 0.205 | 1.026 | 0.125 |
| Y39 | 143.0 | 10.88 | 7.94 | 7.47 | 0.243 | 1.019 | 0.106 |
| V40 | 141.2 | 10.40 | 7.74 | 8.01 | 0.225 | 0.953 | 0.148 |
| G41 |       | 11.93 |      |      |       |       |       |
| S42 | 142.3 | 11.64 | 7.64 | 6.49 | 0.275 | 0.926 | 0.076 |
| K43 | 142.3 | 10.59 | 7.77 | 7.00 | 0.262 | 0.689 | 0.185 |
| T44 | 141.5 | 11.69 | 7.69 | 7.26 | 0.225 |       | 0.093 |
| K45 |       | 10.55 | 7.76 | 6.65 |       |       | 0.113 |
| E46 |       | 11.09 | 8.26 | 6.37 |       |       |       |
| G47 |       | 11.70 |      |      |       |       |       |
| V48 | 142.4 |       | 8.29 | 7.58 | 0.156 |       | 0.078 |
| V49 | 141.4 | 10.13 | 8.17 |      |       | 1.407 | 0.126 |
| H50 | 140.5 | 11.15 | 8.67 | 7.59 | 0.321 |       |       |
| G51 |       | 11.83 | 8.72 |      |       |       |       |
| V52 | 141.5 | 10.90 | 7.73 |      |       | 0.813 | 0.080 |
| A53 | 143.7 | 10.94 | 8.61 | 5.79 | 0.148 | 0.819 | 0.081 |
| T54 | 141.5 | 11.62 |      | 7.56 | 0.165 |       | 0.098 |
| V55 | 142.2 |       | 7.68 |      |       | 0.885 | 0.103 |
| A56 | 144.0 | 10.82 | 8.32 | 5.61 | 0.195 | 0.790 | 0.090 |
| E57 | 143.6 | 10.90 | 8.13 | 6.15 | 0.178 | 1.018 | 0.110 |
| K58 | 143.3 | 10.59 | 8.06 | 6.57 | 0.204 | 0.829 | 0.135 |
| T59 | 142.9 | 11.59 | 7.67 | 7.01 | 0.237 |       | 0.105 |
| K60 | 142.9 | 10.69 | 7.81 |      |       |       |       |
| E61 |       |       |      | 6.17 |       |       |       |
| Q62 | 142.9 |       |      | 7.01 |       | 0.784 | 0.129 |
| V63 | 141.3 |       | 7.90 | 7.70 | 0.174 | 0.872 |       |
| T64 | 141.5 | 11.43 | 7.77 | 7.87 | 0.173 | 0.800 | 0.227 |
| N65 | 142.7 | 10.91 | 8.26 | 7.51 | 0.245 | 0.331 | 0.066 |
| V66 | 141.8 | 10.31 | 7.58 | 7.34 | 0.108 | 0.439 | 0.095 |
| G67 |       | 11.52 | 8.56 |      |       |       |       |
| G68 |       | 11.96 | 8.35 |      |       |       |       |
| A69 | 143.6 | 11.19 | 8.29 | 5.83 | 0.077 | 0.439 | 0.036 |
| V70 | 141.5 | 10.85 | 8.03 | 7.53 | 0.101 | 0.722 | 0.054 |
| V71 | 141.4 | 10.32 | 7.98 | 8.15 | 0.085 | 0.667 | 0.054 |
| T72 | 141.0 | 11.50 | 7.91 | 7.70 | 0.123 | 0.520 | 0.071 |
| G73 |       | 11.73 | 8.51 |      |       |       |       |
| V74 | 142.1 | 10.76 | 7.80 |      |       | 0.638 | 0.000 |
| T75 | 141.1 | 11.44 | 7.62 | 7.62 | 0.120 | 0.641 | 0.096 |
| A76 | 143.7 | 10.87 | 8.39 | 5.87 | 0.131 | 0.674 | 0.078 |
| V77 | 142.0 | 10.63 | 7.70 | 7.45 | 0.120 | 0.793 | 0.073 |
| A78 | 143.7 | 10.96 | 8.43 | 5.62 | 0.155 |       | 0.065 |
| Q79 | 142.9 | 10.96 | 8.31 | 6.79 |       | 0.813 | 0.077 |
| K80 | 143.2 | 10.79 | 8.28 | 6.71 | 0.166 | 0.792 | 0.065 |
| T81 | 141.5 | 11.61 | 7.87 | 7.52 | 0.240 | 0.811 | 0.064 |
| V82 | 141.7 |       | 7.73 | 7.65 | 0.111 | 0.594 | 0.080 |
| E83 | 142.9 | 10.83 | 8.41 | 6.19 | 0.132 | 0.578 | 0.046 |



|      |       |       |      |      |       |       |       |
|------|-------|-------|------|------|-------|-------|-------|
| G84  |       | 11.69 | 8.21 |      |       |       |       |
| A85  | 143.7 | 10.77 | 7.95 | 5.64 | 0.093 | 0.216 | 0.062 |
| G86  |       | 11.72 | 8.36 |      |       |       |       |
| S87  | 142.5 | 11.58 | 7.59 | 6.82 | 0.109 | 0.441 | 0.068 |
| I88  | 141.9 | 10.37 | 7.28 | 7.46 | 0.099 | 0.474 | 0.097 |
| A89  | 144.1 | 10.78 | 8.09 | 5.57 | 0.118 |       | 0.068 |
| A90  | 144.0 | 10.91 | 8.01 | 5.62 |       | 0.433 |       |
| A91  | 144.0 | 10.75 | 8.15 | 5.77 | 0.114 | 0.398 | 0.089 |
| T92  |       | 11.44 | 7.45 | 7.50 | 0.127 | 0.451 | 0.146 |
| G93  |       | 11.63 | 8.29 |      |       |       |       |
| F94  | 143.8 | 11.27 | 7.97 | 6.92 | 0.140 | 0.764 | 0.075 |
| V95  | 141.8 | 10.68 | 7.98 | 8.04 | 0.139 | 1.016 | 0.085 |
| K96  | 142.1 | 10.78 | 8.39 | 6.51 | 0.186 |       |       |
| K97  | 141.6 |       | 7.85 |      |       | 0.667 | 0.092 |
| D98  | 142.8 | 10.94 | 7.91 | 6.72 | 0.237 | 0.532 | 0.119 |
| Q99  | 142.4 | 10.59 | 7.60 | 7.23 | 0.184 |       | 0.152 |
| L100 | 142.3 |       | 7.91 | 6.80 |       | 0.489 | 0.137 |
| G101 |       | 11.76 | 8.43 |      |       |       |       |
| K102 | 142.1 | 10.95 | 7.97 | 6.83 | 0.173 | 0.524 | 0.093 |
| N103 | 142.5 | 11.02 | 8.02 | 7.20 | 0.219 | 0.383 | 0.097 |
| E104 | 142.5 | 10.64 | 7.66 | 6.79 | 0.156 |       |       |
| E105 | 142.4 | 10.66 | 7.99 | 6.39 |       | 0.476 | 0.094 |
| G106 |       | 11.70 | 8.16 |      |       |       |       |
| A107 |       | 11.54 |      | 5.92 | 0.122 |       |       |
| P108 | 148.2 |       | 9.05 |      |       | 0.789 |       |
| Q109 | 142.6 | 10.72 | 8.08 | 6.94 | 0.155 |       | 0.082 |
| E110 | 142.8 | 10.86 | 8.34 | 6.52 |       | 0.728 | 0.078 |
| G111 |       | 11.72 | 8.44 |      |       |       |       |
| I112 | 141.2 | 10.84 | 7.75 | 7.75 | 0.146 | 1.039 | 0.103 |
| L113 | 141.8 | 10.54 | 8.02 | 7.16 | 0.181 |       | 0.105 |
| E114 | 142.5 | 10.83 | 8.07 | 6.72 |       | 0.884 | 0.109 |
| D115 | 143.1 | 10.88 |      | 6.85 | 0.245 | 0.895 | 0.165 |
| M116 |       |       |      | 7.17 | 0.201 |       |       |
| P117 |       |       |      |      |       | 1.657 |       |
| V118 | 141.5 |       | 7.88 | 7.68 | 0.210 |       | 0.140 |
| D119 |       | 10.89 |      | 6.79 |       |       |       |
| P120 | 149.2 |       | 7.66 |      |       | 0.701 |       |
| D121 | 143.5 | 10.56 | 7.54 | 7.14 | 0.338 | 0.537 |       |
| N122 | 143.1 | 10.95 | 7.71 | 7.29 | 0.326 | 0.525 | 0.259 |
| E123 | 143.1 | 10.53 | 7.54 | 6.55 | 0.264 | 0.650 | 0.178 |
| A124 | 143.5 | 10.66 | 7.95 | 6.23 | 0.222 | 0.803 | 0.172 |
| Y125 | 143.8 | 11.13 | 7.95 | 7.09 | 0.216 | 1.228 | 0.170 |
| E126 | 142.4 | 10.85 |      | 7.29 | 0.243 | 0.993 |       |
| M127 |       |       |      | 6.62 | 0.180 |       |       |
| P128 | 148.2 |       | 9.06 |      |       |       |       |
| S129 | 142.7 | 11.63 | 7.85 | 6.65 |       | 0.925 |       |

## S15

|      |       |       |      |      |       |       |       |
|------|-------|-------|------|------|-------|-------|-------|
| E130 |       | 10.66 | 7.67 | 6.86 | 0.190 |       | 0.143 |
| E131 |       | 10.66 | 8.11 | 6.41 |       | 0.579 | 0.084 |
| G132 |       | 11.67 | 8.38 |      |       |       |       |
| Y133 | 143.7 | 11.22 | 7.93 | 6.77 | 0.159 | 0.647 | 0.098 |
| Q134 | 142.3 | 10.89 | 8.13 | 7.55 | 0.164 | 0.592 | 0.089 |
| D135 | 142.7 | 10.84 | 7.95 | 6.97 | 0.183 |       | 0.109 |
| Y136 | 143.2 | 11.27 | 7.97 | 7.17 |       |       |       |
| E137 |       | 10.81 |      | 7.63 |       |       |       |
| P138 | 147.4 |       | 8.86 |      |       | 0.425 |       |
| E139 | 142.5 | 10.73 | 7.57 | 6.71 | 0.077 | 0.196 | 0.098 |
| A140 |       | 10.44 |      | 6.65 | 0.038 |       |       |

**Supplementary Table S2.**  $^{15}\text{N}$  relaxation rates measured in perdeuterated,  $^{15}\text{N}$ -enriched aS (except for Met residues, which are  $^{13}\text{C}^{\text{e}}$ -enriched, but natural abundance  $^{15}\text{N}$ ) at 500 and 900 MHz  $^1\text{H}$  frequency for a 150  $\mu\text{M}$  sample, 15  $^{\circ}\text{C}$ , pH 6.0.

| name | 500 MHz                               |                                       |                               | 900 MHz                               |                               |
|------|---------------------------------------|---------------------------------------|-------------------------------|---------------------------------------|-------------------------------|
|      | $R_1$ [1/s]<br>$\pm 0.006^{\text{a}}$ | $R_2$ [1/s]<br>$\pm 0.011^{\text{a}}$ | NOE<br>$\pm 0.009^{\text{a}}$ | $R_1$ [1/s]<br>$\pm 0.004^{\text{a}}$ | NOE<br>$\pm 0.007^{\text{a}}$ |
| D2   |                                       |                                       |                               |                                       |                               |
| V3   | 1.319                                 | 2.072                                 | -0.841                        | 1.296                                 | 0.088                         |
| F4   | 1.524                                 | 2.495                                 | -0.613                        | 1.510                                 | 0.253                         |
| M5   |                                       |                                       |                               |                                       |                               |
| K6   | 1.643                                 | 2.801                                 | -0.331                        | 1.545                                 | 0.365                         |
| G7   | 1.590                                 | 2.648                                 | -0.320                        |                                       |                               |
| L8   | 1.640                                 | 2.810                                 | -0.214                        | 1.535                                 | 0.435                         |
| S9   | 1.521                                 | 2.626                                 | -0.336                        | 1.428                                 | 0.348                         |
| K10  |                                       |                                       |                               | 1.530                                 | 0.395                         |
| A11  | 1.643                                 | 2.972                                 | -0.211                        | 1.508                                 | 0.388                         |
| K12  | 1.610                                 | 2.912                                 | -0.238                        | 1.432                                 | 0.374                         |
| E13  | 1.650                                 | 3.009                                 | -0.216                        | 1.450                                 | 0.363                         |
| G14  | 1.546                                 | 2.768                                 | -0.275                        |                                       |                               |
| V15  | 1.537                                 | 2.973                                 | -0.198                        | 1.388                                 | 0.385                         |
| V16  | 1.537                                 | 3.137                                 | -0.354                        | 1.370                                 | 0.280                         |
| A17  | 1.539                                 | 3.286                                 | -0.289                        | 1.380                                 | 0.293                         |
| A18  | 1.480                                 | 3.149                                 | -0.240                        | 1.300                                 | 0.296                         |
| A19  | 1.511                                 | 3.164                                 | -0.195                        | 1.320                                 | 0.326                         |
| E20  | 1.565                                 | 3.261                                 | -0.201                        | 1.375                                 | 0.354                         |
| K21  | 1.667                                 | 3.398                                 | -0.186                        | 1.445                                 | 0.376                         |
| T22  | 1.653                                 | 3.328                                 | -0.162                        | 1.461                                 | 0.404                         |
| K23  | 1.679                                 | 3.425                                 | -0.150                        | 1.493                                 | 0.399                         |
| Q24  |                                       |                                       |                               | 1.414                                 | 0.395                         |
| G25  |                                       |                                       |                               |                                       |                               |
| V26  | 1.531                                 | 3.090                                 | -0.168                        | 1.387                                 | 0.390                         |
| A27  | 1.573                                 | 3.156                                 | -0.266                        | 1.420                                 | 0.341                         |
| E28  | 1.547                                 | 2.972                                 | -0.248                        | 1.373                                 | 0.329                         |
| A29  | 1.573                                 | 3.024                                 | -0.266                        | 1.404                                 | 0.320                         |
| A30  |                                       |                                       |                               | 1.336                                 | 0.285                         |
| G31  | 1.488                                 | 2.727                                 | -0.248                        |                                       |                               |
| K32  | 1.601                                 | 2.954                                 | -0.137                        | 1.429                                 | 0.407                         |
| T33  | 1.614                                 | 3.028                                 | -0.202                        | 1.455                                 | 0.388                         |
| K34  |                                       |                                       |                               |                                       |                               |
| E35  | 1.701                                 | 3.240                                 | -0.126                        | 1.479                                 | 0.411                         |
| G36  | 1.642                                 | 3.070                                 | -0.137                        |                                       |                               |
| V37  | 1.632                                 | 3.324                                 | -0.035                        | 1.424                                 | 0.469                         |
| L38  | 1.696                                 | 3.551                                 | -0.122                        | 1.469                                 | 0.422                         |
| Y39  | 1.711                                 | 3.593                                 | -0.032                        | 1.453                                 | 0.454                         |
| V40  | 1.680                                 | 3.592                                 | -0.092                        | 1.436                                 | 0.430                         |
| G41  | 1.682                                 | 3.368                                 | -0.076                        |                                       |                               |

|     |       |       |        |       |       |
|-----|-------|-------|--------|-------|-------|
| S42 | 1.589 | 3.160 | -0.054 | 1.411 | 0.445 |
| K43 | 1.646 | 3.211 | -0.155 | 1.458 | 0.419 |
| T44 | 1.693 | 3.183 | -0.104 | 1.489 | 0.427 |
| K45 | 1.701 | 3.316 | -0.145 | 1.503 | 0.431 |
| E46 | 1.694 | 3.280 | -0.134 | 1.456 | 0.430 |
| G47 | 1.607 | 2.851 | -0.190 |       |       |
| V48 | 1.574 | 2.950 | -0.112 | 1.422 | 0.414 |
| V49 | 1.606 | 3.079 | -0.258 | 1.421 | 0.354 |
| H50 | 1.590 | 3.078 | -0.228 | 1.412 | 0.351 |
| G51 |       |       |        |       |       |
| V52 | 1.469 | 2.863 | -0.253 | 1.335 | 0.338 |
| A53 | 1.484 | 2.869 | -0.371 | 1.364 | 0.274 |
| T54 | 1.457 | 2.709 | -0.324 | 1.308 | 0.278 |
| V55 |       |       |        | 1.376 | 0.328 |
| A56 | 1.554 | 3.179 | -0.255 | 1.387 | 0.306 |
| E57 | 1.557 | 3.048 | -0.230 | 1.356 | 0.348 |
| K58 | 1.654 | 3.267 | -0.186 | 1.444 | 0.375 |
| T59 | 1.645 | 3.231 | -0.150 | 1.454 | 0.384 |
| K60 |       |       |        | 1.451 | 0.411 |
| E61 | 1.685 | 3.201 | -0.155 | 1.474 | 0.422 |
| Q62 |       |       |        | 1.476 | 0.389 |
| V63 | 1.569 | 2.834 | -0.268 | 1.421 | 0.329 |
| T64 | 1.575 | 2.788 | -0.317 | 1.427 | 0.295 |
| N65 | 1.565 | 2.565 | -0.326 | 1.432 | 0.317 |
| V66 | 1.439 | 2.220 | -0.479 | 1.347 | 0.246 |
| G67 | 1.500 | 2.222 | -0.401 |       |       |
| G68 | 1.337 | 1.943 | -0.488 |       |       |
| A69 | 1.343 | 1.981 | -0.484 | 1.340 | 0.247 |
| V70 | 1.349 | 2.065 | -0.561 | 1.278 | 0.166 |
| V71 | 1.488 | 2.310 | -0.508 | 1.404 | 0.233 |
| T72 | 1.507 | 2.365 | -0.457 | 1.405 | 0.246 |
| G73 | 1.435 | 2.256 | -0.450 |       |       |
| V74 | 1.479 | 2.310 | -0.318 | 1.398 | 0.337 |
| T75 | 1.464 | 2.480 | -0.458 | 1.381 | 0.222 |
| A76 | 1.468 | 2.405 | -0.413 | 1.410 | 0.256 |
| V77 | 1.417 | 2.487 | -0.431 | 1.298 | 0.221 |
| A78 | 1.506 | 2.667 | -0.407 | 1.398 | 0.269 |
| Q79 | 1.473 | 2.531 | -0.382 | 1.341 | 0.265 |
| K80 | 1.553 | 2.699 | -0.337 | 1.428 | 0.310 |
| T81 | 1.560 | 2.619 | -0.323 | 1.439 | 0.336 |
| V82 | 1.557 | 2.593 | -0.357 | 1.443 | 0.284 |
| E83 | 1.599 | 2.573 | -0.358 | 1.455 | 0.290 |
| G84 | 1.466 | 2.234 | -0.446 |       |       |
| A85 | 1.486 | 2.248 | -0.345 | 1.423 | 0.334 |
| G86 | 1.347 | 1.973 | -0.529 |       |       |
| S87 | 1.400 | 2.113 | -0.427 | 1.369 | 0.282 |

|      |       |       |        |       |       |
|------|-------|-------|--------|-------|-------|
| I88  | 1.454 | 2.300 | -0.476 | 1.387 | 0.234 |
| A89  | 1.517 | 2.522 | -0.452 | 1.432 | 0.241 |
| A90  | 1.439 | 2.340 | -0.420 | 1.341 | 0.242 |
| A91  | 1.432 | 2.296 | -0.412 | 1.347 | 0.252 |
| T92  | 1.443 | 2.419 | -0.380 | 1.323 | 0.263 |
| G93  | 1.529 | 2.464 | -0.315 |       |       |
| F94  | 1.584 | 2.674 | -0.152 | 1.456 | 0.411 |
| V95  | 1.598 | 2.865 | -0.237 | 1.430 | 0.358 |
| K96  | 1.703 | 3.008 | -0.171 | 1.510 | 0.394 |
| K97  |       |       |        |       |       |
| D98  | 1.750 | 3.129 | -0.066 | 1.525 | 0.466 |
| Q99  | 1.698 | 2.999 | -0.089 | 1.481 | 0.419 |
| L100 | 1.708 | 2.890 | -0.133 | 1.518 | 0.431 |
| G101 | 1.627 | 2.626 | -0.191 |       |       |
| K102 | 1.668 | 2.796 | -0.141 | 1.501 | 0.432 |
| N103 | 1.654 | 2.695 | -0.233 | 1.495 | 0.387 |
| E104 | 1.651 | 2.700 | -0.199 | 1.476 | 0.386 |
| E105 | 1.653 | 2.711 | -0.215 | 1.463 | 0.382 |
| G106 | 1.527 | 2.403 | -0.299 |       |       |
| A107 | 1.521 | 2.610 | -0.181 | 1.398 | 0.407 |
| P108 |       |       |        |       |       |
| Q109 | 1.550 | 2.672 | -0.303 | 1.393 | 0.333 |
| E110 | 1.581 | 2.753 | -0.242 | 1.400 | 0.329 |
| G111 | 1.505 | 2.554 | -0.285 |       |       |
| I112 | 1.556 | 2.869 | -0.172 | 1.400 | 0.385 |
| L113 | 1.580 | 3.069 | -0.295 | 1.430 | 0.337 |
| E114 | 1.568 | 3.168 | -0.249 | 1.357 | 0.351 |
| D115 | 1.577 | 3.135 | -0.225 | 1.372 | 0.341 |
| M116 |       |       |        |       |       |
| P117 |       |       |        |       |       |
| V118 | 1.523 | 3.456 | -0.199 | 1.322 | 0.343 |
| D119 | 1.592 | 3.695 | -0.156 | 1.367 | 0.375 |
| P120 |       |       |        |       |       |
| D121 | 1.662 | 3.989 | -0.028 | 1.390 | 0.409 |
| N122 | 1.626 | 3.692 | -0.068 | 1.355 | 0.407 |
| E123 | 1.608 | 3.516 | -0.126 | 1.364 | 0.380 |
| A124 | 1.595 | 3.533 | -0.145 | 1.375 | 0.405 |
| Y125 | 1.545 | 3.330 | -0.101 | 1.320 | 0.397 |
| E126 | 1.637 | 3.593 | -0.135 | 1.401 | 0.408 |
| M127 |       |       |        |       |       |
| P128 |       |       |        |       |       |
| S129 | 1.520 | 3.171 | -0.220 | 1.337 | 0.338 |
| E130 | 1.570 | 3.069 | -0.198 | 1.386 | 0.363 |
| E131 | 1.614 | 3.027 | -0.200 | 1.398 | 0.348 |
| G132 | 1.554 | 2.669 | -0.239 |       |       |
| Y133 | 1.620 | 2.885 | -0.117 | 1.476 | 0.441 |



|      |       |       |        |       |        |
|------|-------|-------|--------|-------|--------|
| Q134 | 1.615 | 2.854 | -0.241 | 1.465 | 0.379  |
| D135 | 1.634 | 2.736 | -0.250 | 1.483 | 0.403  |
| Y136 | 1.556 | 2.583 | -0.257 | 1.448 | 0.421  |
| E137 | 1.578 | 2.508 | -0.407 | 1.495 | 0.369  |
| P138 |       |       |        |       |        |
| E139 | 1.370 | 1.942 | -0.767 | 1.346 | 0.144  |
| A140 | 1.006 | 1.342 | -1.367 | 1.084 | -0.235 |

<sup>a</sup> Reported errors correspond to the statistical uncertainties in the fits and do not include the unknown impact of potential systematic errors.

**Supplementary Table S3.** Spectral densities derived from the relaxation rates of Supplementary Table 2 using reduced spectral density mapping. Values reported for  $J(2\omega_H)$  at 600 and 900 MHz are calculated from  $J(0.87\omega_H)$  at 900 MHz assuming a Lorentzian distribution.

|     | $J(0)$<br>[ns/rad] | $J(\omega_N)$<br>500 MHz<br>[ns/rad] | $J(0.87\omega_H)$<br>500 MHz<br>[ps/rad] | $J(0.87\omega_H)$<br>900 MHz<br>[ps/rad] | $J(2\omega_H)$<br>600 MHz<br>[ps/rad] | $J(2\omega_H)$<br>900 MHz<br>[ps/rad] |
|-----|--------------------|--------------------------------------|------------------------------------------|------------------------------------------|---------------------------------------|---------------------------------------|
| D2  |                    |                                      |                                          |                                          |                                       |                                       |
| V3  | 0.39               | 0.20                                 | 37.87                                    | 18.43                                    | 7.89                                  | 3.49                                  |
| F4  | 0.49               | 0.24                                 | 38.34                                    | 17.59                                    | 7.53                                  | 3.33                                  |
| M5  |                    |                                      |                                          |                                          |                                       |                                       |
| K6  | 0.57               | 0.27                                 | 34.11                                    | 15.30                                    | 6.55                                  | 2.90                                  |
| L8  | 0.57               | 0.28                                 | 31.05                                    | 13.53                                    | 5.79                                  | 2.56                                  |
| S9  | 0.54               | 0.25                                 | 31.69                                    | 14.52                                    | 6.21                                  | 2.75                                  |
| K10 |                    |                                      |                                          |                                          |                                       |                                       |
| A11 | 0.62               | 0.28                                 | 31.03                                    | 14.39                                    | 6.16                                  | 2.72                                  |
| K12 | 0.61               | 0.27                                 | 31.09                                    | 13.98                                    | 5.98                                  | 2.65                                  |
| E13 | 0.63               | 0.28                                 | 31.29                                    | 14.41                                    | 6.16                                  | 2.73                                  |
| V15 | 0.64               | 0.26                                 | 28.72                                    | 13.31                                    | 5.70                                  | 2.52                                  |
| V16 | 0.69               | 0.25                                 | 32.46                                    | 15.38                                    | 6.58                                  | 2.91                                  |
| A17 | 0.74               | 0.26                                 | 30.94                                    | 15.22                                    | 6.51                                  | 2.88                                  |
| A18 | 0.71               | 0.25                                 | 28.62                                    | 14.27                                    | 6.11                                  | 2.70                                  |
| A19 | 0.71               | 0.26                                 | 28.16                                    | 13.88                                    | 5.94                                  | 2.63                                  |
| E20 | 0.73               | 0.27                                 | 29.31                                    | 13.85                                    | 5.93                                  | 2.62                                  |
| K21 | 0.75               | 0.28                                 | 30.84                                    | 14.06                                    | 6.02                                  | 2.66                                  |
| T22 | 0.73               | 0.28                                 | 29.96                                    | 13.58                                    | 5.81                                  | 2.57                                  |
| K23 | 0.76               | 0.29                                 | 30.11                                    | 13.99                                    | 5.99                                  | 2.65                                  |
| Q24 |                    |                                      |                                          |                                          |                                       |                                       |
| V26 | 0.68               | 0.26                                 | 27.89                                    | 13.20                                    | 5.65                                  | 2.50                                  |
| A27 | 0.69               | 0.26                                 | 31.06                                    | 14.59                                    | 6.25                                  | 2.76                                  |
| E28 | 0.64               | 0.26                                 | 30.11                                    | 14.37                                    | 6.15                                  | 2.72                                  |
| A29 | 0.65               | 0.26                                 | 31.06                                    | 14.89                                    | 6.37                                  | 2.82                                  |
| A30 |                    |                                      |                                          |                                          |                                       |                                       |
| K32 | 0.63               | 0.28                                 | 28.39                                    | 13.22                                    | 5.66                                  | 2.50                                  |
| T33 | 0.65               | 0.27                                 | 30.26                                    | 13.89                                    | 5.94                                  | 2.63                                  |
| K34 |                    |                                      |                                          |                                          |                                       |                                       |
| E35 | 0.70               | 0.29                                 | 29.87                                    | 13.59                                    | 5.81                                  | 2.57                                  |
| V37 | 0.74               | 0.29                                 | 26.34                                    | 11.79                                    | 5.05                                  | 2.23                                  |
| L38 | 0.80               | 0.29                                 | 29.68                                    | 13.24                                    | 5.67                                  | 2.51                                  |
| Y39 | 0.81               | 0.30                                 | 27.54                                    | 12.37                                    | 5.29                                  | 2.34                                  |
| V40 | 0.81               | 0.29                                 | 28.61                                    | 12.77                                    | 5.46                                  | 2.42                                  |
| S42 | 0.70               | 0.28                                 | 26.12                                    | 12.21                                    | 5.23                                  | 2.31                                  |

|     |      |      |       |       |      |      |
|-----|------|------|-------|-------|------|------|
| K43 | 0.70 | 0.28 | 29.65 | 13.21 | 5.65 | 2.50 |
| T44 | 0.68 | 0.29 | 29.15 | 13.31 | 5.69 | 2.52 |
| K45 | 0.72 | 0.29 | 30.38 | 13.34 | 5.71 | 2.52 |
| E46 | 0.71 | 0.29 | 29.96 | 12.94 | 5.54 | 2.45 |
| V48 | 0.63 | 0.27 | 27.30 | 13.00 | 5.56 | 2.46 |
| V49 | 0.66 | 0.27 | 31.51 | 14.32 | 6.13 | 2.71 |
| H50 | 0.67 | 0.27 | 30.45 | 14.29 | 6.12 | 2.70 |
| V52 | 0.62 | 0.25 | 28.71 | 13.78 | 5.90 | 2.61 |
| A53 | 0.62 | 0.25 | 31.73 | 15.44 | 6.61 | 2.92 |
| T54 | 0.57 | 0.24 | 30.09 | 14.73 | 6.30 | 2.79 |
| V55 |      |      |       |       |      |      |
| A56 | 0.70 | 0.26 | 30.42 | 15.01 | 6.42 | 2.84 |
| E57 | 0.66 | 0.26 | 29.87 | 13.79 | 5.90 | 2.61 |
| K58 | 0.71 | 0.28 | 30.59 | 14.08 | 6.02 | 2.66 |
| T59 | 0.71 | 0.28 | 29.50 | 13.97 | 5.98 | 2.64 |
| K60 |      |      |       |       |      |      |
| E61 | 0.69 | 0.29 | 30.35 | 13.29 | 5.69 | 2.51 |
| Q62 |      |      |       |       |      |      |
| V63 | 0.59 | 0.26 | 31.03 | 14.87 | 6.36 | 2.81 |
| T64 | 0.58 | 0.26 | 32.35 | 15.69 | 6.71 | 2.97 |
| N65 | 0.51 | 0.26 | 32.37 | 15.25 | 6.53 | 2.89 |
| V66 | 0.42 | 0.23 | 33.19 | 15.84 | 6.78 | 3.00 |
| A69 | 0.37 | 0.22 | 31.08 | 15.74 | 6.73 | 2.98 |
| V70 | 0.39 | 0.22 | 32.84 | 16.62 | 7.11 | 3.15 |
| V71 | 0.44 | 0.24 | 35.00 | 16.80 | 7.19 | 3.18 |
| T72 | 0.45 | 0.25 | 34.25 | 16.52 | 7.07 | 3.13 |
| V74 | 0.45 | 0.25 | 30.40 | 14.46 | 6.19 | 2.74 |
| T75 | 0.50 | 0.24 | 33.29 | 16.76 | 7.17 | 3.17 |
| A76 | 0.48 | 0.24 | 32.35 | 16.36 | 7.00 | 3.10 |
| V77 | 0.51 | 0.23 | 31.63 | 15.77 | 6.75 | 2.98 |
| A78 | 0.55 | 0.25 | 33.05 | 15.94 | 6.82 | 3.02 |
| Q79 | 0.51 | 0.24 | 31.75 | 15.37 | 6.58 | 2.91 |
| K80 | 0.55 | 0.26 | 32.38 | 15.37 | 6.58 | 2.91 |
| T81 | 0.53 | 0.26 | 32.19 | 14.90 | 6.38 | 2.82 |
| V82 | 0.52 | 0.26 | 32.95 | 16.11 | 6.90 | 3.05 |
| E83 | 0.51 | 0.26 | 33.87 | 16.11 | 6.89 | 3.05 |
| A85 | 0.43 | 0.25 | 31.17 | 14.78 | 6.32 | 2.80 |
| S87 | 0.40 | 0.23 | 31.16 | 15.33 | 6.56 | 2.90 |
| I88 | 0.44 | 0.24 | 33.47 | 16.57 | 7.09 | 3.14 |
| A89 | 0.50 | 0.25 | 34.35 | 16.95 | 7.25 | 3.21 |
| A90 | 0.46 | 0.24 | 31.87 | 15.85 | 6.78 | 3.00 |
| A91 | 0.45 | 0.23 | 31.54 | 15.71 | 6.72 | 2.97 |
| T92 | 0.48 | 0.24 | 31.06 | 15.21 | 6.51 | 2.88 |

|      |      |      |       |       |      |      |
|------|------|------|-------|-------|------|------|
| F94  | 0.54 | 0.27 | 28.46 | 13.38 | 5.72 | 2.53 |
| V95  | 0.60 | 0.27 | 30.83 | 14.32 | 6.13 | 2.71 |
| K96  | 0.63 | 0.29 | 31.10 | 14.27 | 6.11 | 2.70 |
| K97  |      |      |       |       |      |      |
| D98  | 0.66 | 0.30 | 29.10 | 12.70 | 5.43 | 2.40 |
| Q99  | 0.63 | 0.29 | 28.84 | 13.42 | 5.74 | 2.54 |
| L100 | 0.59 | 0.29 | 30.18 | 13.47 | 5.76 | 2.55 |
| K102 | 0.57 | 0.29 | 29.68 | 13.30 | 5.69 | 2.52 |
| N103 | 0.54 | 0.28 | 31.81 | 14.29 | 6.12 | 2.70 |
| E104 | 0.54 | 0.28 | 30.87 | 14.13 | 6.05 | 2.67 |
| E105 | 0.54 | 0.28 | 31.32 | 14.10 | 6.03 | 2.67 |
| A107 | 0.54 | 0.26 | 28.02 | 12.93 | 5.53 | 2.45 |
| P108 |      |      |       |       |      |      |
| Q109 | 0.55 | 0.26 | 31.50 | 14.49 | 6.20 | 2.74 |
| E110 | 0.57 | 0.27 | 30.63 | 14.65 | 6.27 | 2.77 |
| I112 | 0.61 | 0.27 | 28.44 | 13.43 | 5.75 | 2.54 |
| L113 | 0.66 | 0.26 | 31.91 | 14.79 | 6.33 | 2.80 |
| E114 | 0.70 | 0.26 | 30.54 | 13.74 | 5.88 | 2.60 |
| D115 | 0.69 | 0.27 | 30.13 | 14.10 | 6.03 | 2.67 |
| M116 |      |      |       |       |      |      |
| P117 |      |      |       |       |      |      |
| V118 | 0.79 | 0.26 | 28.48 | 13.55 | 5.80 | 2.56 |
| D119 | 0.86 | 0.27 | 28.70 | 13.33 | 5.70 | 2.52 |
| P120 |      |      |       |       |      |      |
| D121 | 0.94 | 0.29 | 26.65 | 12.81 | 5.48 | 2.42 |
| N122 | 0.85 | 0.28 | 27.08 | 12.53 | 5.36 | 2.37 |
| E123 | 0.80 | 0.28 | 28.24 | 13.19 | 5.64 | 2.50 |
| A124 | 0.81 | 0.27 | 28.48 | 12.76 | 5.46 | 2.41 |
| Y125 | 0.76 | 0.27 | 26.53 | 12.41 | 5.31 | 2.35 |
| E126 | 0.82 | 0.28 | 28.98 | 12.94 | 5.54 | 2.45 |
| M127 |      |      |       |       |      |      |
| P128 |      |      |       |       |      |      |
| S129 | 0.71 | 0.26 | 28.92 | 13.80 | 5.91 | 2.61 |
| E130 | 0.67 | 0.27 | 29.33 | 13.77 | 5.89 | 2.61 |
| E131 | 0.65 | 0.27 | 30.21 | 14.22 | 6.08 | 2.69 |
| Y133 | 0.60 | 0.28 | 28.22 | 12.87 | 5.51 | 2.44 |
| Q134 | 0.59 | 0.27 | 31.26 | 14.19 | 6.07 | 2.68 |
| D135 | 0.55 | 0.28 | 31.86 | 13.81 | 5.91 | 2.61 |
| Y136 | 0.52 | 0.26 | 30.51 | 13.08 | 5.60 | 2.47 |
| E137 | 0.49 | 0.26 | 34.63 | 14.71 | 6.30 | 2.78 |
| P138 |      |      |       |       |      |      |
| E139 | 0.34 | 0.21 | 37.76 | 17.97 | 7.69 | 3.40 |
| A140 | 0.21 | 0.14 | 37.14 |       |      |      |

**Supplementary Table S4.** Number of conformers for each residue type in the coil data base after applying the selection criteria described in Material and Methods.

|                             |            |            |            |            |            |            |            |            |
|-----------------------------|------------|------------|------------|------------|------------|------------|------------|------------|
| <b>Residue type</b>         | <b>Ala</b> | <b>Asp</b> | <b>Asn</b> | <b>Arg</b> | <b>Gln</b> | <b>Glu</b> | <b>His</b> | <b>Ile</b> |
| <b>Number of conformers</b> | 8564       | 9467       | 7423       | 5435       | 4136       | 7182       | 3107       | 4547       |
| <b>Residue type</b>         | <b>Leu</b> | <b>Lys</b> | <b>Met</b> | <b>Phe</b> | <b>Ser</b> | <b>Thr</b> | <b>Tyr</b> | <b>Val</b> |
| <b>Number of conformers</b> | 7837       | 6738       | 1685       | 4356       | 8584       | 7017       | 3991       | 6013       |

## References

1. Smith LJ, Bolin KA, Schwalbe H, MacArthur MW, Thornton JM, Dobson CM. (1996) Analysis of main chain torsion angles in proteins: Prediction of NMR coupling constants for native and random coil conformations. *J Mol Biol* 255:494-506.
